# Supplementary material for: Central carbon flux controls growth/damage balance for Streptococcus pyogenes
Source: PubMed Central journal article supplement (PMC10337930; doi:10.1371/journal.ppat.1011481), 2023-06-29
Supplement: ppat.1011481.s004.pdf [file ppat.1011481.s004.pdf]

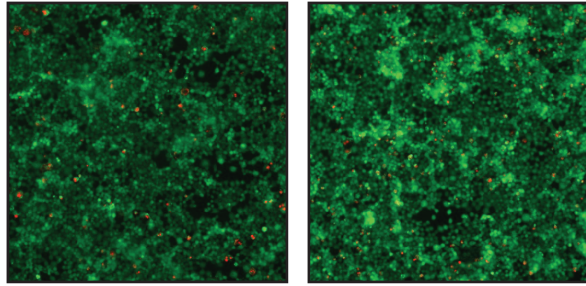

WT

$\Delta$ Pdh

---

4 hrs post-infection

S4 Fig
