# Supplementary material for: Central carbon flux controls growth/damage balance for Streptococcus pyogenes
Source: PubMed Central journal article supplement (PMC10337930; doi:10.1371/journal.ppat.1011481), 2023-06-29
Supplement: ppat.1011481.s005.pdf [file ppat.1011481.s005.pdf]

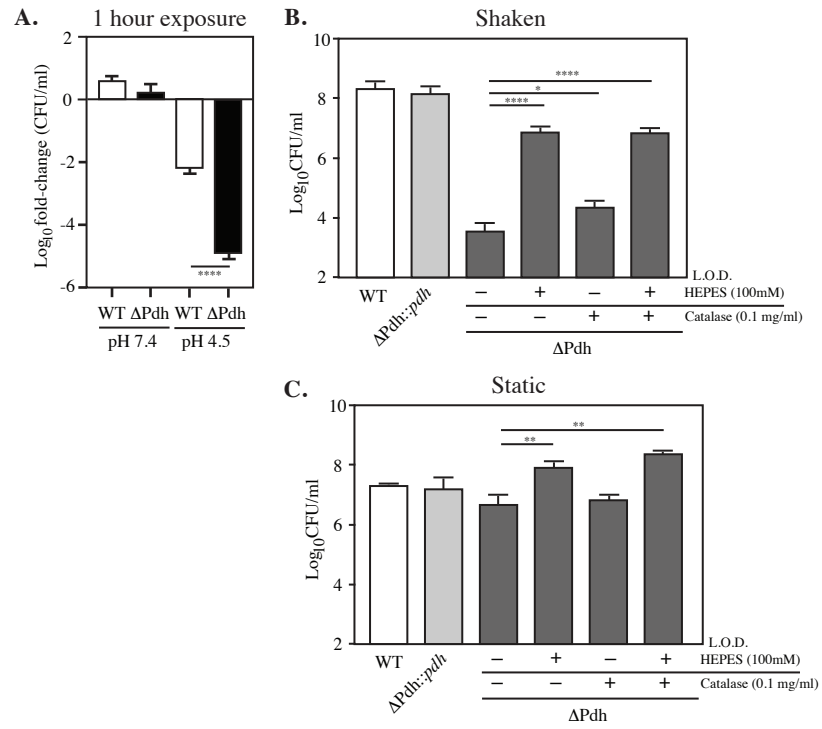

S5 Fig
