# Supplementary material for: Central carbon flux controls growth/damage balance for Streptococcus pyogenes
Source: PubMed Central journal article supplement (PMC10337930; doi:10.1371/journal.ppat.1011481), 2023-06-29
Supplement: ppat.1011481.s008.pdf [file ppat.1011481.s008.pdf]

**Table S2. Genes in Raw267.4 cells differentially expressed between infection by  $\Delta$ Pdh and WT**

| Gene ID    | Log <sub>2</sub> Fold-Change | P adj    | Gene name | Description/Function                                                                                                                                                                                       |
|------------|------------------------------|----------|-----------|------------------------------------------------------------------------------------------------------------------------------------------------------------------------------------------------------------|
| 0000000325 | 1.8931                       | 9.55E-07 | Arvcf     | Involved in protein-protein interactions at adherens junctions.                                                                                                                                            |
| 0000000386 | 1.0129                       | 4.01E-16 | Mx1       | Correlated with FOXP3 and IL-10.                                                                                                                                                                           |
| 0000000392 | 1.4523                       | 6.30E-06 | Fap       | Knockdown of FAP in CAF9 cells attenuated migration of TE-9 cells and macrophage-like cells and suppressed expression of CD163 and IL10.                                                                   |
| 0000001131 | 1.5862                       | 2.14E-05 | Timp1     | A novel IL-10 signalling mechanism regulates TIMP-1 expression, wound healing and tissue repair.                                                                                                           |
| 0000003541 | 1.0145                       | 6.48E-05 | Ier3      | May play a role in the ERK signaling pathway                                                                                                                                                               |
| 0000003545 | 3.6876                       | 1.12E-05 | Fosb      | Suppress systemic inflammatory response to endotoxin, dependent on CREB                                                                                                                                    |
| 0000006403 | 1.0274                       | 1.70E-02 | Adamts4   | ADAMTS-4 increased the production of IL-10                                                                                                                                                                 |
| 0000006445 | 1.6952                       | 3.82E-14 | Epha2     | EphA2 expression may regulate the progression to advanced atherosclerosis by regulating smooth muscle proliferation and extracellular matrix deposition                                                    |
| 0000011008 | 1.1925                       | 7.03E-09 | Mcoln2    | MCOLN2 belongs to the transient receptor potential (TRP) protein superfamily, which consists of gated, tetrameric cation channels with diverse physiological functions, particularly in sensory signaling. |
| 0000014599 | 1.1464                       | 2.28E-20 | Csf1      | In tumors, expression of CSF1 was correlated with M2-like macrophages. CSF-1 has therapeutic potential in tissue repair.                                                                                   |
| 0000015396 | 1.0106                       | 3.50E-04 | Cd83      | A specific marker for mature dendritic cells                                                                                                                                                               |
| 0000016283 | 1.0528                       | 1.43E-03 | H2-M2     | MHC class Ib antigen                                                                                                                                                                                       |
| 0000016529 | 1.5056                       | 9.07E-04 | Il10      | Human cytokine synthesis inhibitory factor (CSIF), is an anti-inflammatory cytokine                                                                                                                        |
| 0000018925 | 1.6923                       | 1.71E-03 | Heatr9    | Heatr9 is induced by influenza virus and RSV. Heatr9 knockdown during viral infection was shown to affect chemokine expression.                                                                            |
| 0000018930 | 1.1305                       | 9.15E-04 | Ccl4      | Resveratrol improves CCL4-induced liver fibrosis in mouse by upregulating endogenous IL-10 to reprogramme macrophages phenotype from M(LPS) to M(IL-4).                                                    |
| 0000020108 | 1.4567                       | 5.57E-09 | Ddit4     | IL-10 suppresses mammalian target of rapamycin (mTOR) activity through the induction of an mTOR inhibitor, DDIT4. IL-10 inhibits mTORC1 signalling in a STAT3-DDIT4- dependent manner                      |
| 0000020423 | 1.1469                       | 7.33E-27 | Btg2      | Enhanced BTG2 induces G2/M cell cycle arrest and apoptotic                                                                                                                                                 |
| 0000020826 | 1.3178                       | 3.48E-28 | Nos2      | IL-10 and NOS2 modulate antigen-specific reactivity and nerve infiltration by T cells in experimental leprosy. Expressions of IL10 and NOS2 (iNOS) were negatively correlated (P<0.001).                   |
| 0000021367 | 1.7272                       | 9.44E-04 | Edn1      | Endothelin-1 (ET-1), which is up-regulated during tissue repair and fibrosis, induces lung fibroblasts to produce and contract extracellular matrix                                                        |
| 0000024486 | 1.8345                       | 7.99E-06 | Hbegf     | HB-EGF levels increase in response to different forms of injuries as well as stimuli, such as lysophosphatidic acid, retinoic acid                                                                         |
| 0000025491 | 2.0027                       | 7.64E-09 | Ifitm1    | Ifitm1 (Interferon induced transmembrane protein 1)                                                                                                                                                        |
| 0000025746 | 1.7658                       | 1.41E-04 | Il6       | Functions in inflammation and the maturation of B cells.                                                                                                                                                   |
| 0000026817 | 1.2800                       | 7.22E-13 | Ak1       | Plays an important role in cellular energy homeostasis and in adenine nucleotide metabolism                                                                                                                |
| 0000026981 | 1.1022                       | 7.33E-37 | Il1rn     | Interleukin 1 Receptor Antagonist, This protein inhibits the activities of interleukin 1, alpha (IL1A) and interleukin 1, beta (IL1B)                                                                      |
| 0000027219 | 1.1501                       | 4.39E-04 | Slc28a2   | Uptake and salvage of purine nucleosides in kidney and other tissues                                                                                                                                       |
| 0000027398 | 1.8828                       | 1.12E-04 | Il1b      | Potent proinflammatory cytokine                                                                                                                                                                            |
| 0000027399 | 2.0150                       | 7.82E-05 | Il1a      | Cell-to-cell communication                                                                                                                                                                                 |
| 0000028211 | 1.9485                       | 4.40E-22 | Trp53inp1 | Regulates cell cycle progression and apoptosis, antioxidant                                                                                                                                                |
| 0000028270 | 1.0913                       | 6.21E-04 | Gbp2      | Protective immunity against microorganisms, Inhibition of Stat3 pathway prevents GBP2-promoted FN1 induction and cell invasion.                                                                            |
| 0000028341 | 1.4138                       | 2.10E-09 | Nr4a3     | NR4A3 expression is also increased at sites of neutrophilic inflammation                                                                                                                                   |
| 0000028602 | 1.4454                       | 6.64E-10 | Tnfrsf8   | CD30L (=CD153): T and B cell activation, TNF receptor superfamily                                                                                                                                          |
| 0000028716 | 1.2066                       | 1.24E-05 | Pdzk1ip1  | Cargo protein that transports membrane proteins from the endoplasmic reticulum, triggering local inflammation                                                                                              |
| 0000028967 | 1.2466                       | 4.37E-25 | Errfi1    | mig6/errfi-1, a negative regulator of the EGFR family                                                                                                                                                      |
| 0000030748 | 1.1722                       | 4.05E-09 | Il4ra     | A deletion of IL-4R $\alpha$ completely abrogates TB tissue pathology in these mice                                                                                                                        |
| 0000031444 | 1.2707                       | 1.89E-21 | F10       | Vitamin K-dependent coagulation factor X of the blood coagulation cascade                                                                                                                                  |
| 0000031779 | 1.0309                       | 2.65E-04 | Ccl22     | High CCL22 controls had significantly elevated levels of anti-inflammatory II10 compared with low CCL22 controls.                                                                                          |
| 0000032578 | 2.3870                       | 1.21E-12 | Cish      | Cytokine-induced STAT inhibitor (CIS), also known as suppressor of cytokine signaling (SOCS), or STAT-induced STAT inhibitor (SSI), protein family.                                                        |
| 0000032584 | 1.8159                       | 3.82E-06 | Mst1r     | Macrophage Stimulating 1 Receptor                                                                                                                                                                          |

|             |        |          |              |                                                                                                                                                                                                                                                                                                                                                                                                                                             |
|-------------|--------|----------|--------------|---------------------------------------------------------------------------------------------------------------------------------------------------------------------------------------------------------------------------------------------------------------------------------------------------------------------------------------------------------------------------------------------------------------------------------------------|
| 00000034394 | 1.4041 | 2.02E-05 | Lif          | LIF confers protection against endotoxemia induced by the bacterial endotoxin lipopolysaccharide (LPS) by enhancing interleukin 10 (IL10) and inhibiting tumor necrosis factor alpha (TNF $\alpha$ ) synthesis and release by M $\phi$ s                                                                                                                                                                                                    |
| 00000034457 | 1.7854 | 1.16E-15 | Eda2r        | Ectodysplasin A2 Receptor, EDA: control of hair follicle, sweat gland, teeth development, TNF receptor superfamily                                                                                                                                                                                                                                                                                                                          |
| 00000035042 | 1.1900 | 2.31E-02 | Ccl5         | CCL5-induced the elevation of IL-10 expression, on Ang II-induced 12-lipoxygenase (LO) and endothelin (ET)-1 expression                                                                                                                                                                                                                                                                                                                     |
| 00000035356 | 1.1324 | 2.95E-03 | Nfkbiz       | NF-kappa-B inhibitor zeta, Studies in mouse indicate that this gene product is one of the nuclear I kappa B proteins and an activator of IL-6 production.                                                                                                                                                                                                                                                                                   |
| 00000035373 | 1.1654 | 1.95E-07 | Ccl7         | A secreted chemokine which attracts macrophages during inflammation and metastasis                                                                                                                                                                                                                                                                                                                                                          |
| 00000037447 | 1.3123 | 2.93E-06 | Arid5a       | AT-Rich Interaction Domain 5A, As RNA-binding protein involved in the regulation of inflammatory response by stabilizing selective inflammation-related mRNAs, such as IL6, STAT3 and TBX21. Arid5a controls IL-6 mRNA stability, which contributes to elevation of IL-6 level in vivo                                                                                                                                                      |
| 00000038067 | 1.3985 | 1.63E-02 | Csf3         | Colony stimulating factor 3 (CSF3)                                                                                                                                                                                                                                                                                                                                                                                                          |
| 00000038179 | 1.2124 | 2.05E-03 | Slamf7       | CS1 (also known as CD319, CRACC and SLAMF7) was identified as an NK cell receptor regulating immune functions.                                                                                                                                                                                                                                                                                                                              |
| 00000040026 | 1.5036 | 4.96E-04 | Saa3         | The presence of SAA3 in the inflamed colon mucosal serves to protect epithelial barrier in part through expansion of IL-22-producing neutrophils.                                                                                                                                                                                                                                                                                           |
| 00000040264 | 1.1319 | 6.14E-03 | Gbp2b        | Infection caused a large increase of Gbp2b/Gbp1 and Gbp5 expression                                                                                                                                                                                                                                                                                                                                                                         |
| 00000040663 | 1.2317 | 3.49E-06 | Ccl1         | In mice, CLCF1 induces B-cell expansion, enhances humoral responses and triggers autoimmunity. CLCF1 is another member of the IL-6-type cytokine                                                                                                                                                                                                                                                                                            |
| 00000041801 | 1.9090 | 1.99E-29 | Phlda3       | Tumor suppressor.                                                                                                                                                                                                                                                                                                                                                                                                                           |
| 00000043421 | 1.0397 | 1.96E-20 | Hilpda       | Hypoxia-inducible Lipid Droplet-associated (HILPDA) Is                                                                                                                                                                                                                                                                                                                                                                                      |
| 00000043953 | 1.1893 | 1.38E-04 | Cerl2        | Plays a critical role for the development of Th2 responses                                                                                                                                                                                                                                                                                                                                                                                  |
| 00000044313 | 1.2662 | 2.70E-03 | Mab2113      | Mab-21 Like 3                                                                                                                                                                                                                                                                                                                                                                                                                               |
| 00000044701 | 1.2467 | 2.71E-02 | Il27         | Pleiotropic cytokine capable of influencing both innate and adaptive immune responses. With anti- and pro-inflammatory activity                                                                                                                                                                                                                                                                                                             |
| 00000044786 | 1.0368 | 2.39E-04 | Zfp36        | Strikingly, loss of ZFP36 in vivo accelerated T cell responses to acute viral infection and enhanced anti-viral immunity.                                                                                                                                                                                                                                                                                                                   |
| 00000046031 | 1.2534 | 7.51E-03 | Fam26f       | FAM26F (family with sequence similarity 26, member F) is a recently identified tetraspanin-like membrane glycoprotein which is predicted to make homophilic interactions and potential synapses between several immune cells                                                                                                                                                                                                                |
| 00000046733 | 1.1894 | 4.99E-07 | Gprc5a       | Tumor suppressor                                                                                                                                                                                                                                                                                                                                                                                                                            |
| 00000048458 | 1.7762 | 4.28E-11 | Fam212b      | Induced In Neural Crest By AP2-Alpha Protein-Related Homolog                                                                                                                                                                                                                                                                                                                                                                                |
| 00000051379 | 1.4969 | 1.92E-36 | Flrt3        | Flrt3 is induced by bacterial infection, implicated in neurite outgrowth and cell adhesion                                                                                                                                                                                                                                                                                                                                                  |
| 00000053113 | 1.2719 | 1.66E-03 | Socs3        | STAT-induced STAT inhibitor (SSI)                                                                                                                                                                                                                                                                                                                                                                                                           |
| 00000053318 | 1.3644 | 7.44E-03 | Slamf8       | Anti-inflammatory, Slamf8 is a negative regulator of Nox2 activity in macrophages                                                                                                                                                                                                                                                                                                                                                           |
| 00000053846 | 2.0451 | 2.71E-03 | Lipg         | Endothelial lipase (LIPG), LIPG is naturally acknowledged to be a biological factor to the lipid metabolism and atherosclerosis                                                                                                                                                                                                                                                                                                             |
| 00000054203 | 1.1756 | 5.91E-08 | Ifi205       | Regulates immune signaling via transcriptional regulation of the inflammasome adapter ASC                                                                                                                                                                                                                                                                                                                                                   |
| 00000054855 | 1.1527 | 7.84E-09 | Rnd1         | Rnd1 expression was found to be induced during inflammation in endothelial cells                                                                                                                                                                                                                                                                                                                                                            |
| 00000058427 | 1.2694 | 1.60E-05 | Cxcl2        | Macrophage chemokines CXCL1/CXCL2 control the early stage of neutrophil recruitment during tissue inflammation.                                                                                                                                                                                                                                                                                                                             |
| 00000060183 | 1.3732 | 4.66E-05 | Cxcl11       | Predominantly induced by interferon (IFN)- $\gamma$ and share an exclusive chemokine receptor named CXC chemokine receptor 3 (CXCR3).                                                                                                                                                                                                                                                                                                       |
| 00000061878 | 1.0708 | 7.79E-08 | Sphk1        | Glucocorticoids attenuate inflammation in a murine model of ALI by synergistic upregulation of SphK1 gene expression in macrophages; The induction of both LIGHT and SPHK1 mRNA was dependent on IL-10                                                                                                                                                                                                                                      |
| 00000062345 | 1.4446 | 1.08E-03 | Serp1b2      | Protects macrophages from apoptosis; Macrophage expression of serpinB2 is upregulated by LPS through a mechanism involving CREB and NF $\kappa$ B and is important for the maintenance of TLR4 activation, thereby preventing rapid macrophage death and premature cessation of the innate immune response; Recent studies have implicated an anti-inflammatory role for serpinB2 and it is considered to be part of the M2-associated gene |
| 00000069662 | 1.8878 | 4.22E-07 | Marcks       | MARCKS constitutes 90% of all proteins synthesized in neutrophils in response to exposure to TNF- $\alpha$ or LPS; During the inflammatory response, MARCKS has also been shown to act as a major regulator of human neutrophil migration and adhesion                                                                                                                                                                                      |
| 00000072844 | 1.2771 | 5.42E-04 | i530011006Ri | Lysosomal, immune-related, and lipid metabolic genes                                                                                                                                                                                                                                                                                                                                                                                        |
| 00000078763 | 1.0555 | 4.45E-03 | Slnf1        | SLFN11 specifically blocks the production of retroviruses such as HIV-1                                                                                                                                                                                                                                                                                                                                                                     |
| 00000079138 | 1.0495 | 5.24E-03 | Gm8818       |                                                                                                                                                                                                                                                                                                                                                                                                                                             |

|             |        |          |           |                                                                                                                                            |
|-------------|--------|----------|-----------|--------------------------------------------------------------------------------------------------------------------------------------------|
| 00000081219 | 1.2494 | 2.77E-03 | Bambi-ps1 | BMP and activin membrane-bound inhibitor, pseudogene                                                                                       |
| 00000085178 | 1.0772 | 2.07E-03 | Kdm6bos   | KDM1 lysine (K)-specific demethylase 6B                                                                                                    |
| 00000087263 | 1.1072 | 2.86E-02 | Gm15726   |                                                                                                                                            |
| 00000090231 | 1.0374 | 1.37E-06 | Cfb       | Complement factor B                                                                                                                        |
| 00000105504 | 1.3606 | 9.41E-07 | Gbp5      | Overexpression of GBP5 inhibited virus replication by enhancing the expression of virus-induced interferon (IFN) and IFN-related effectors |
| 00000108436 | 1.0419 | 1.23E-02 | Gm44851   |                                                                                                                                            |

---

<sup>1</sup>Ensembl Mouse (GRCm39). [https://useast.ensembl.org/Mus\\_musculus](https://useast.ensembl.org/Mus_musculus).

<sup>2</sup>Log<sub>2</sub>-fold change of normalized mean hit counts derived from two independent experiments: Log<sub>2</sub>(ΔPdh/WT).

<sup>3</sup>Wald test p value

<sup>4</sup>Benjamini-Hochberg false discovery rate adjusted p-value.
