# Supplementary material for: Central carbon flux controls growth/damage balance for Streptococcus pyogenes
Source: PubMed Central journal article supplement (PMC10337930; doi:10.1371/journal.ppat.1011481), 2023-06-29
Supplement: ppat.1011481.s009.pdf [file ppat.1011481.s009.pdf]

**Table S3. The 25 most relevant pathways identified by Reactome<sup>1</sup>.**

| Pathway Name                                                                                             | Entities <sup>2</sup> |          |          | Reaction         |             |          |
|----------------------------------------------------------------------------------------------------------|-----------------------|----------|----------|------------------|-------------|----------|
|                                                                                                          | found                 | ratio    | p-value  | FDR <sup>3</sup> | found       | ratio    |
| Interleukin-10 signaling                                                                                 | 27 / 86               | 0.006    | 1.11E-16 | 1.14E-14         | 12 / 15     | 0.001    |
| Signaling by Interleukins                                                                                | 41 / 67               | 0.044    | 1.11E-16 | 1.14E-14         | 95 / 493    | 0.037    |
| Cytokine Signaling in Immune system                                                                      | 51 / 1,108            | 0.075    | 1.11E-16 | 1.14E-14         | 109 / 687   | 0.052    |
| Interleukin-4 and Interleukin-13 signaling                                                               | 20 / 216              | 0.015    | 1.55E-15 | 1.20E-13         | 22 / 47     | 0.004    |
| Immune System                                                                                            | 52 / 2,713            | 0.184    | 4.00E-13 | 2.48E-11         | 139 / 1,593 | 0.012    |
| Chemokine receptors bind chemokines                                                                      | 10 / 57               | 0.004    | 5.97E-11 | 3.04E-09         | 7 / 19      | 0.001    |
| Peptide ligand-binding receptors                                                                         | 11 / 211              | 0.014    | 1.45E-06 | 6.39E-09         | 10 / 76     | 0.006    |
| CLEC7A/inflammasome pathway                                                                              | 3 / 8                 | 5.43E-05 | 4.30E-05 | 0.002            | 2 / 4       | 3.02E-04 |
| Interleukin-6 family signaling                                                                           | 4 / 31                | 0.002    | 1.33E-04 | 0.005            | 22 / 34     | 0.003    |
| Inhibition of nitric oxide production                                                                    | 2 / 5                 | 3.40E-04 | 8.03E-04 | 0.025            | 2 / 5       | 3.78E-04 |
| Interferon alpha/beta signaling                                                                          | 7 / 91                | 0.013    | 0.001    | 0.029            | 2 / 5       | 0.002    |
| Interleukin-12 family signaling                                                                          | 5 / 96                | 0.007    | 0.001    | 0.03             | 11 / 114    | 0.009    |
| PTK6 Activates STAT3                                                                                     | 2 / 7                 | 4.76E-04 | 0.002    | 0.036            | 3 / 9       | 6.80E-04 |
| Class A/1 (Rhodopsin-like receptor                                                                       | 11 / 475              | 0.032    | 0.002    | 0.04             | 10 / 158    | 0.012    |
| Interleukin-1 processing                                                                                 | 2 / 8                 | 5.43E-04 | 0.002    | 0.04             | 2 / 5       | 3.78E-04 |
| Transport of gamma-carboxylated protein precursors from the endoplasmic reticulum to the Golgi apparatus | 2 / 9                 | 6.11E-04 | 0.003    | 0.048            | 2 / 9       | 6.80E-04 |
| Removal of aminoterminal propeptides from gamma- carboxylated proteins                                   | 2 / 10                | 6.79E-04 | 0.003    | 0.051            | 2 / 9       | 6.80E-04 |

|                                                                                     |         |          |       |       |         |          |
|-------------------------------------------------------------------------------------|---------|----------|-------|-------|---------|----------|
| Gene and protein expression by JAK STAT signaling after Interleukin stimulation     | 4 / 73  | 0.005    | 0.003 | 0.051 | 2 / 36  | 0.003    |
| CLEC7A (Dectin-1) signaling                                                         | 5 / 120 | 0.008    | 0.003 | 0.051 | 3 / 45  | 0.003    |
| RUNX1 regulates transcription of genes involved in differentiation of keratinocytes | 2 / 11  | 7.47E-04 | 0.004 | 0.056 | 2 / 8   | 6.04E-04 |
| Interleukin-12 signaling                                                            | 4 / 84  | 0.006    | 0.005 | 0.072 | 2 / 56  | 0.004    |
| Interferon Signaling                                                                | 9 / 401 | 0.027    | 0.006 | 0.078 | 10 / 69 | 0.005    |
| CD163 mediating an anti- inflammatory response                                      | 2 / 14  | 9.51E-04 | 0.006 | 0.078 | 1 / 9   | 6.80E-04 |
| Senescence-Associated Secretory Phenotype (SASP)                                    | 4 / 91  | 0.006    | 0.007 | 0.082 | 5 / 22  | 0.002    |
| Gama-carboxylation, transport, and amino-terminal cleavage of proteins              | 2 / 16  | 0.001    | 0.008 | 0.093 | 5 / 277 | 0.002    |

<sup>1</sup><http://reactome.org>

<sup>2</sup>Differentially-regulated genes  $\Delta$ Pdh vs. WT. See Table S2.

<sup>3</sup>False discovery rate
