# Supplementary material for: Central carbon flux controls growth/damage balance for Streptococcus pyogenes
Source: PubMed Central journal article supplement (PMC10337930; doi:10.1371/journal.ppat.1011481), 2023-06-29
Supplement: ppat.1011481.s010.pdf [file ppat.1011481.s010.pdf]

**Table S4. Plasmids used in this study**

| <b>Plasmid</b>                            | <b>Features</b>                                            | <b>Reference</b> |
|-------------------------------------------|------------------------------------------------------------|------------------|
| Cloning plasmids                          |                                                            |                  |
| pABG5                                     | Shuttle vector                                             | 1                |
| pJRS233                                   | Low-copy shuttle vector used for allelic replacement       | 2                |
| pGCP213                                   | High-copy shuttle vector used for allelic replacement      | 3                |
| pSPC18                                    | Integrational vector                                       | 4                |
| Allelic replacement plasmids <sup>1</sup> |                                                            |                  |
| pEP98                                     | pGCP213:: <i>Aldh</i> , allelic replacement plasmid        | This study       |
| pJAM199                                   | pGCP213:: <i>Apdh</i> , allelic replacement plasmid        | This study       |
| pEP101                                    | pGCP213:: <i>Apfl</i> , allelic replacement plasmid        | This study       |
| pJAM147                                   | pGCP213:: <i>Aslo</i> , allelic replacement plasmid        | This study       |
| Complementation plasmids <sup>1</sup>     |                                                            |                  |
| pJAM86                                    | pGCP1122:: <i>3'guaB-Pdh</i> , allelic replacement plasmid | This study       |

<sup>1</sup>Plasmids constructed as described in the Materials and Methods using the primers listed in Table S5.

## REFERENCES

1. Granok AB, Parsonage D, Ross RP, Caparon MG. 2000. J Bacteriol. 182:1529-40.
2. Perez-Casal J, Price JA, Maguin E, Scott JR. 1993. Mol Microbiol. 8:809-19.
3. Nielsen HV, Guiton PS, et. al., 2012. MBio. 4:e00177-12.
4. Cho KH, Caparon MG. 2005. Mol Microbiol. 57:11545-56.
