# Supplementary material for: Central carbon flux controls growth/damage balance for Streptococcus pyogenes
Source: PubMed Central journal article supplement (PMC10337930; doi:10.1371/journal.ppat.1011481), 2023-06-29
Supplement: ppat.1011481.s011.pdf [file ppat.1011481.s011.pdf]

**Table S5. Mutagenic, complementation and RT-PCR Primers used in this Study**

| Name              | Sequence                                                  | Template          | Plasmid <sup>2</sup> |
|-------------------|-----------------------------------------------------------|-------------------|----------------------|
| KO pdhA 3'R       | CAGAGATAGCAGCTTCTGAAATTGG                                 | HSC5 <sup>1</sup> | pJAM199              |
| KO pdhA 3'F       | GTAGCCTTCGAAGACGTTTGGGTT                                  |                   |                      |
| KO pdhA 5'R       | CAAATGTTGTTCTTTAGAAACTGTTACCAT                            |                   |                      |
| KO pdhA 5'f       | GCTTTGCTACTTGTGTTGAAGGTGT                                 |                   |                      |
| KOpdhA Fwd Screen | GTCAAGGTCGGTAAAACGTGAA                                    |                   |                      |
| KOpdhA Rev Screen | TCCCGAAGTCTCCTCCGTA                                       |                   |                      |
| pdhA guaB site F  | GGCACAATATGTCAGCCCTTAAAGTTACTATCGAAGACGTTTGGGTTGACTAA     | HSC5              | pJAM86               |
| pdhA guaB site R  | GCACCAAACCTATTCTGTGCACTGATAATTTAATTACGACGCTCTTTTTGATTAGCT |                   |                      |
| pfl 5' F (BamHI)  | GGCGGATCCTTCGTGACGTGTCATTAATCAGTGGAA                      | HSC5              | pEP101               |
| pfl 5' R          | CAGCAGCATCAACATCTGTATTGGTTTTAACAGTTGCC                    |                   |                      |
| pfl 3' F          | TACAGATGTTGATGCTGCTGAAGCTATTTCAAGTAA                      |                   |                      |
| pfl 3' R (EcoRI)  | GGCGAATTCGTCAGTTGCTTTACAATGCACTAAAGC                      |                   |                      |
| KOpfl Fwd Screen  | GACGTGTCATTAATCAGTGGAA                                    |                   |                      |
| KOpfl Rev Screen  | GGCAGTTTTAGTGATCTTATTGC                                   |                   |                      |
| ldh 5' F (BamHI)  | GGCGGATCCGCCACAATGACACTCATGGCATAG                         | HSC5              | pEP98                |
| ldh 5' R          | CAAATTCCTTATACTTTTTTGTGTTGTTTAGTTGCAGTCAT                 |                   |                      |
| ldh 3'F           | CAAAAAAGTAGAAGAATTTGCTTCTGCTGCTAAAAAC                     |                   |                      |
| ldh 3' R (PstI)   | GGCCTGCAGCCAAGAAGGAGTGACCATTGAAAAG                        |                   |                      |
| KOldh Fwd Screen  | GGCATAGTCAATGAAACTCGTT                                    |                   |                      |
| KOldh Rev Screen  | TTCAACAAACCTTACAACCTACATC                                 |                   |                      |
| Up SLO KO FBamHI  | GATATGGATCCATGTATAAGGTGCCAAAGGG                           | HSC5              | pJAM147              |
| Up SLO KO ROH     | GCTAGCACGCGTACCTTTTTATCATTCTAAAATGTTTT                    |                   |                      |

|               |                                    |
|---------------|------------------------------------|
| Dn SLO KO FOH | ACGCGTGCTAGCGACTGGTTCAAGAGGTTTCG   |
| Dn SLO KO R   | GATATCTCGAGAAAAGCTGTAATACCTCAAATAT |
| Fwd SLO KO    | CATAAAAGGCTATACCCAATTG             |
| Rev SLO KO    | AGGCAGTAGCTACTCAAGC                |

---

<sup>1</sup>Chromosomal DNA template prepared from HSC5 (1).

<sup>2</sup>Primers were used to construct or confirm the plasmids listed in Table S4 as described in the Materials and Methods.

#### REFERENCES

1. Port GC, Paluscio E, Caparon MG. 2013. Genome Announc. e00612-00613.
